# Supplementary material for: Biosynthesis of copper, cobalt, and zinc oxide nanoparticles using the seed extract of Citrullus lanatus and determination of biological potentials
Source: Royal Society of Chemistry journal article supplement (doi:10.1039/d6ra02015a), 2026-05-28
Supplement: d6ra02015a1.pdf [file d6ra02015a1.pdf]

**Supplementary Information**

**Biosynthesis of copper, cobalt, and zinc oxide nanoparticles using seed extract of  
*Citrullus lanatus* and determination of biological potentials**

Wajeaha Gohar<sup>a</sup>, Khalil Nawaz<sup>a</sup>, Wardha Zafar<sup>a</sup>, Ambreen Nasir Cheema<sup>b</sup>, Nadeem Raza<sup>c</sup>,  
Muddassar Zafar<sup>d</sup>, Muhammad Faizan Nazar<sup>e</sup>, Sajjad Hussain Sumrra<sup>\*a</sup>

<sup>a</sup>*Department of Chemistry, University of Gujrat, Gujrat 50700, Pakistan*

<sup>b</sup>*Department of Chemistry, University of Engineering and Technology, Lahore 54890, Pakistan*

<sup>c</sup>*Department of Chemistry, College of Science, Imam Mohammad Ibn Saud Islamic University,  
Riyadh, Saudi Arabia*

<sup>d</sup>*Department of Biochemistry and Biotechnology, University of Gujrat, Gujrat 50700, Pakistan*

<sup>e</sup>*Department of Chemistry, Division of Science and Technology, University of Education,  
Lahore, Multan Campus, Pakistan*

---

\* Corresponding author: [sajjadchemist@gmail.com](mailto:sajjadchemist@gmail.com)/[sajjadchemist@uog.edu.pk](mailto:sajjadchemist@uog.edu.pk)



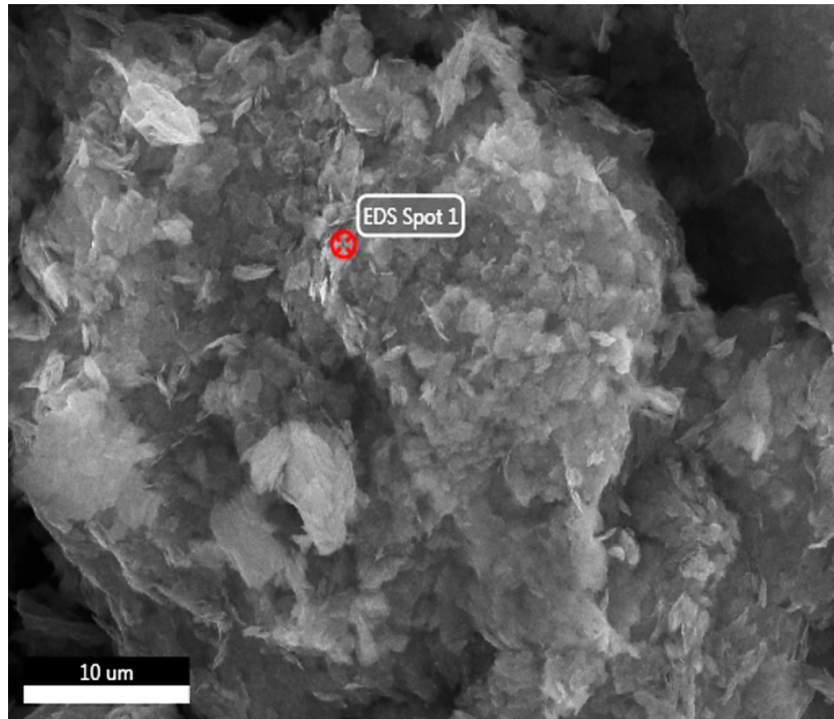

**Fig. S4.** EDS spot for cobalt oxide nanoparticles

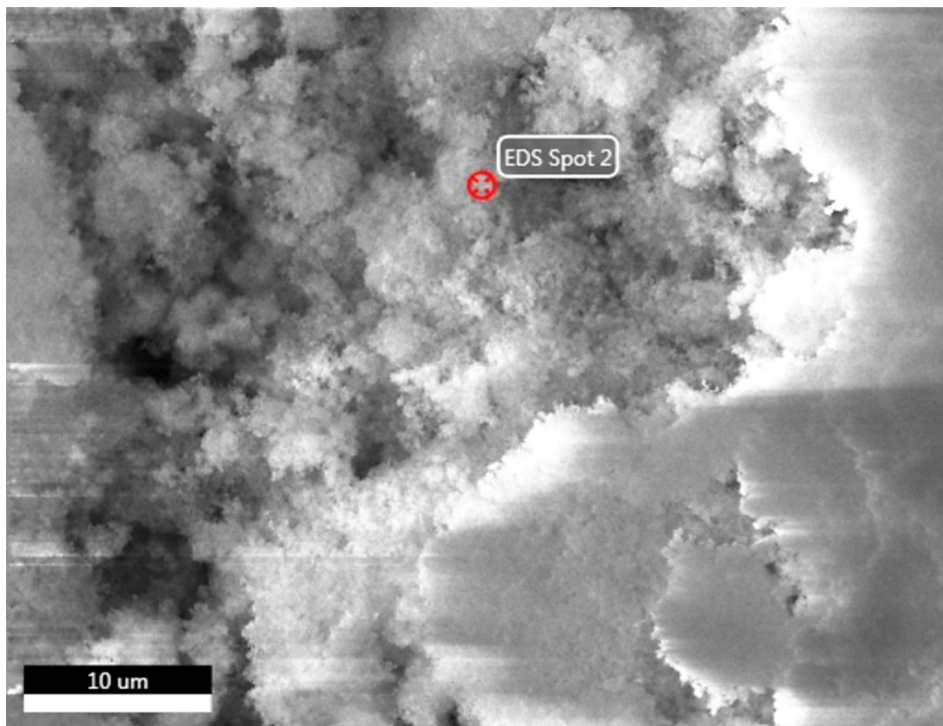

**Fig. S5.** EDS spot for copper oxide nanoparticles

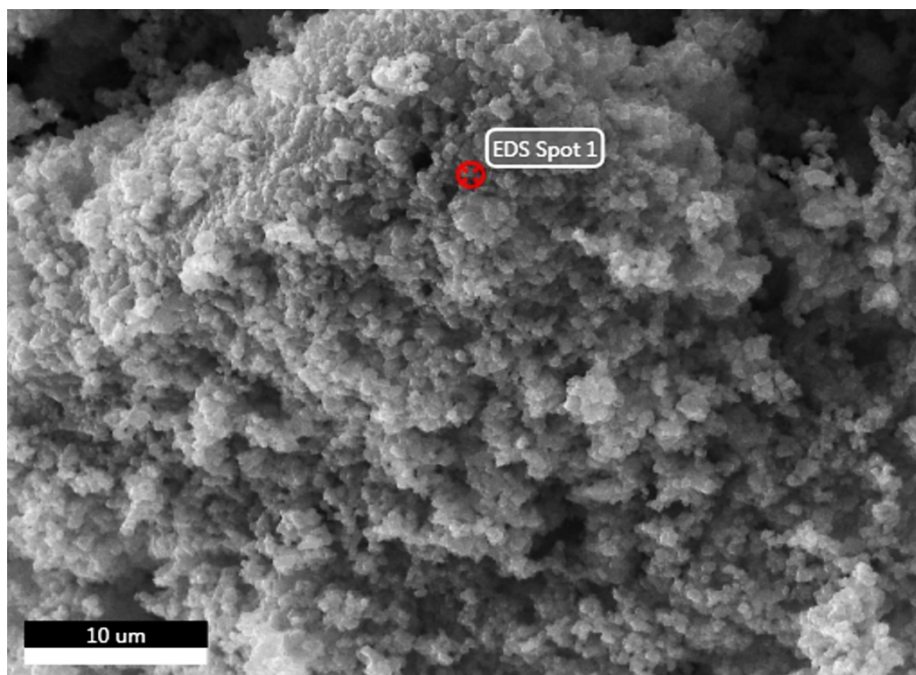

**Fig. S6.** EDS spot for zinc oxide nanoparticles

**Name and formula**

|                    |                                |
|--------------------|--------------------------------|
| Reference code:    | <b>00-042-1467</b>             |
| Compound name:     | Cobalt Oxide                   |
| Empirical formula: | Co <sub>3</sub> O <sub>4</sub> |
| Chemical formula:  | Co <sub>3</sub> O <sub>4</sub> |

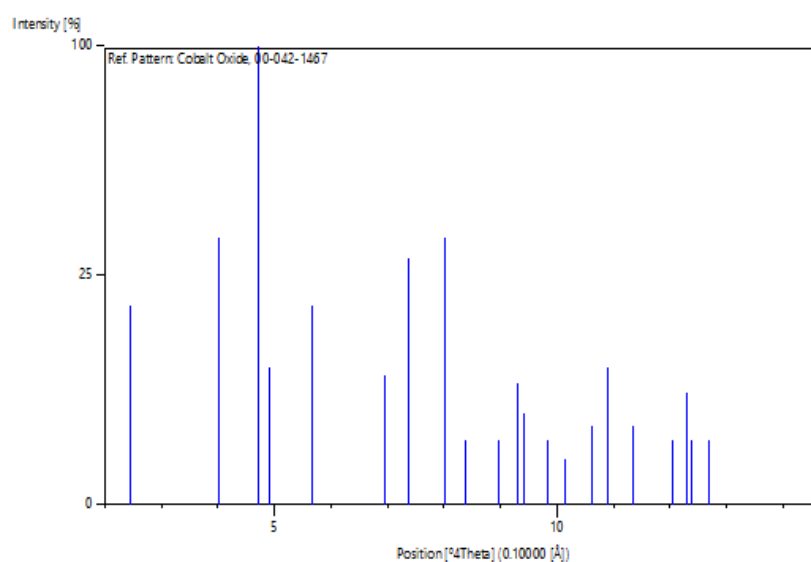

**Fig. S7:** Stick pattern of XRD for cobalt oxide nanoparticles



**Table S1. EDX data for the cobalt oxide nanoparticles**

| Element | Weight<br>% | Atomic<br>% | Net Int. | Error<br>% | K ratio | Z      | R      | A      | F      |
|---------|-------------|-------------|----------|------------|---------|--------|--------|--------|--------|
| O K     | 9.06        | 25.40       | 340.30   | 9.34       | 0.0427  | 1.2450 | 0.8741 | 0.3783 | 1.0000 |
| SiK     | 5.75        | 9.17        | 299.99   | 9.49       | 0.0272  | 1.1439 | 0.9319 | 0.4113 | 1.0071 |
| CaK     | 1.72        | 1.92        | 106.15   | 16.04      | 0.0184  | 1.0879 | 0.9766 | 0.8973 | 1.0927 |
| CoK     | 83.47       | 63.50       | 2088.19  | 2.30       | 0.8226  | 0.9566 | 1.0154 | 0.9999 | 1.0304 |

**Table S2. EDX data for the copper oxide nanoparticles**

| Element | Weight<br>% | Atomic<br>% | Net Int. | Error<br>% | K ratio | Z      | R      | A      | F      |
|---------|-------------|-------------|----------|------------|---------|--------|--------|--------|--------|
| O K     | 2.09        | 7.01        | 52.31    | 15.56      | 0.0080  | 1.2793 | 0.8553 | 0.3014 | 1.0000 |
| AlK     | 5.46        | 10.87       | 143.69   | 12.58      | 0.0153  | 1.1493 | 0.9050 | 0.2430 | 1.0036 |
| S K     | 4.72        | 7.91        | 232.29   | 10.85      | 0.0308  | 1.1555 | 0.9302 | 0.5581 | 1.0127 |
| CuK     | 87.73       | 74.20       | 1343.92  | 2.71       | 0.8872  | 0.9722 | 1.0103 | 0.9998 | 1.0404 |

**Table S3. EDX data for the zinc oxide nanoparticles**

| Element | Weight<br>% | Atomic<br>% | Net Int. | Error<br>% | K ratio | Z      | R      | A      | F      |
|---------|-------------|-------------|----------|------------|---------|--------|--------|--------|--------|
| O K     | 0.52        | 2.10        | 14.29    | 67.12      | 0.0017  | 1.3059 | 0.8351 | 0.2485 | 1.0000 |
| ZnK     | 99.48       | 97.90       | 1679.17  | 2.77       | 1.0368  | 0.9981 | 1.0006 | 1.0001 | 1.0441 |

**Table S4. Crystallite size of CoO nanoparticles**

| hkl | d-Spacing<br>(Å) | theta   | 2 theta   | FWHM    | Crystalline size<br>(nm) | Average size<br>(nm) |
|-----|------------------|---------|-----------|---------|--------------------------|----------------------|
| 222 | 2.354305438      | 19.1008 | 38.2015   | 0.74665 | 11.25982408              | 12.38049377          |
| 442 | 0.894066941      | 59.5058 | 119.01158 | 1.15955 | 13.50116346              |                      |

**Table S5. Crystallite size of CuO nanoparticles**

| <b>hkl</b> | <b>d-Spacing<br/>(Å)</b> | <b>theta</b> | <b>2 theta</b> | <b>FWHM</b> | <b>Crystalline size<br/>(nm)</b> | <b>Average size<br/>(nm)</b> |
|------------|--------------------------|--------------|----------------|-------------|----------------------------------|------------------------------|
|            | 3.87782569               | 11.4591      | 22.91816       | 0.72296     | 11.21205115                      | 10.46750092                  |
| 110        | 2.75020331               | 16.2677      | 32.5353        | 0.78705     | 10.51472559                      |                              |
| -111       | 2.513676255              | 17.8474      | 35.69486       | 0.86449     | 9.654164184                      |                              |
| 111        | 2.322349063              | 19.374       | 38.748         | 1.05483     | 7.983420159                      |                              |
| -202       | 1.868318911              | 24.3525      | 48.705         | 0.67217     | 12.97314351                      |                              |

**Table S6. Crystallite size of ZnO nanoparticles**

| <b>hkl</b> | <b>d-Spacing<br/>(Å)</b> | <b>theta</b> | <b>2 theta</b> | <b>FWHM</b> | <b>Crystalline size<br/>(nm)</b> | <b>Average size<br/>(nm)</b> |
|------------|--------------------------|--------------|----------------|-------------|----------------------------------|------------------------------|
| 100        | 2.817544332              | 15.8685      | 31.7369        | 0.76326     | 10.82072128                      | 11.76250657                  |
| 2          | 2.605277469              | 17.2         | 34.39993       | 0.76764     | 10.83346578                      |                              |
| 101        | 2.479032267              | 18.1054      | 36.21085       | 0.79147     | 10.56026243                      |                              |
| 102        | 1.913125174              | 23.7466      | 47.49314       | 0.73756     | 11.76731372                      |                              |
| 110        | 1.626771308              | 28.2667      | 56.53336       | 0.80689     | 11.17857942                      |                              |
| 103        | 1.478589269              | 31.4019      | 62.8037        | 0.76697     | 12.1354489                       |                              |
| 112        | 1.380914783              | 33.9101      | 67.82015       | 0.63639     | 15.04175445                      |                              |

**Table S7. Antibacterial activity of synthesized nanoparticles**

| <b>Metal oxide<br/>nanoparticles</b> | <b>Zone of Inhibition (mm)</b>     |                                          |                                     |                                         |
|--------------------------------------|------------------------------------|------------------------------------------|-------------------------------------|-----------------------------------------|
|                                      | <b><i>Escherichia<br/>coli</i></b> | <b><i>Pseudomonas<br/>aeruginosa</i></b> | <b><i>Bacillus<br/>subtilis</i></b> | <b><i>Staphylococcus<br/>aureus</i></b> |
| Co <sub>3</sub> O <sub>4</sub>       | 11                                 | 9                                        | 9                                   | –                                       |
| CuO                                  | 9                                  | 11                                       | 8                                   | 15                                      |
| ZnO                                  | 14                                 | 14                                       | 15                                  | 13                                      |
| <i>Levofloxacin</i>                  | 29                                 | 27                                       | 32                                  | 26                                      |

**Table S8. Antioxidant activity of synthesized nanoparticles**

| <b>Inhibition (%)</b>            |                   |                               |                                  |
|----------------------------------|-------------------|-------------------------------|----------------------------------|
| <b>Metal oxide nanoparticles</b> | <b>DPPH assay</b> | <b>Total phenolic content</b> | <b>Total iron-reducing power</b> |
| Co <sub>3</sub> O <sub>4</sub>   | 71                | 44.69                         | 40.67                            |
| CuO                              | 18                | 49.24                         | 25.4                             |
| ZnO                              | 90                | 81.81                         | 36.72                            |
| CL Seeds Extract                 | 28                | 49                            | 23                               |
| Gallic acid                      | -                 | 94.603                        | -                                |
| BHT                              | 93.75             | -                             | 85                               |

**Table S9. Enzyme inhibition activity of synthesized nanoparticles**

| <b>Enzyme Inhibition (%)</b>     |                            |                                 |
|----------------------------------|----------------------------|---------------------------------|
| <b>Metal oxide nanoparticles</b> | <b>Protease Inhibition</b> | <b>Alpha-amylase inhibition</b> |
| Co <sub>3</sub> O <sub>4</sub>   | 42.56                      | 61.82                           |
| CuO                              | 70.46                      | 26.97                           |
| ZnO                              | 71.05                      | 47.71                           |
| CL Seeds Extract                 | 40                         | 35                              |
| Acarbose                         | -                          | 73                              |
| Aprotinin                        | 78                         | -                               |
